# Supplementary material for: High interannual surface p CO 2 variability in the southern Canadian Arctic Archipelago's Kitikmeot Sea
Source: Copernicus journal article supplement (doi:10.5194/os-19-837-2023), 2023-06-15
Supplement: Supplementary file 1 [file os-19-837-2023-supplement.zip]

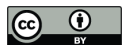

## *Supplement of*

# **High interannual surface $p\text{CO}_2$ variability in the southern Canadian Arctic Archipelago's Kitikmeot Sea**

**Richard P. Sims et al.**

*Correspondence to:* Richard P. Sims (richardpeter.sims@ucalgary.ca)

- os-19-837-2023-supplement-title-page.pdf
- EC tower data
  - pco2.mat
  - wind\_data\_rich.mat
- Plotting scripts
  - plot\_Berg\_underway\_data.m
- Processed data
  - 2016\_undpCO2\_proc.mat
  - 2017\_undpCO2\_proc.mat
  - 2018\_undpCO2\_proc.mat
  - 2019\_undpCO2\_proc.mat
- Processing scripts
  - Bergmann\_2016\_underway.m
  - Bergmann\_2017\_underway.m
  - Bergmann\_2018\_underway.m
  - Bergmann\_2019\_underway.m
- Raw data
  - 2016\_und.mat
  - 2017\_und.mat
  - 2018\_und.mat
  - 2019\_und.mat
- Read me for supplement files.docx

- Sims\_et\_al\_2023\_Kitikmeot pco2\_\_2023-04-19\_supplement.docx
- Temperature calibration data
  - 2017\_temp\_cal.mat
  - 2018\_temp\_cal.mat

The copyright of individual parts of the supplement might differ from the article licence.
